# Supplementary material for: Antidiabetic Effect of Casein Glycomacropeptide Hydrolysates on High-Fat Diet and STZ-Induced Diabetic Mice via Regulating Insulin Signaling in Skeletal Muscle and Modulating Gut Microbiota
Source: MDPI journal article supplement (doi:10.3390/nu12010220), 2020-01-15
Supplement: s1 [file s1]

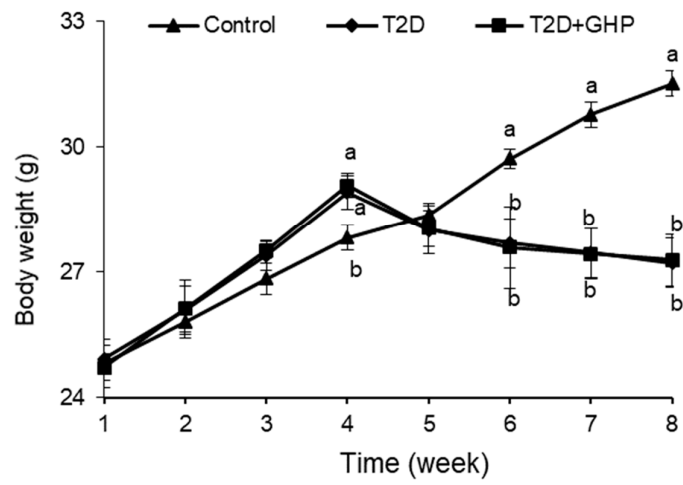

Figure S1 Body weight before GHP administration. Mice in T2D and T2D+GHP groups were fed high-fat diet for eight weeks and were injected with STZ in the fifth week to induce diabetes. Values with different letters (a-b) indicate significantly difference ( $p < 0.05$ ).
